# 1 A Personalized Probabilistic Approach to Ovarian Cancer Diagnostics

2 Dongjo Ban<sup>1</sup>, Stephen N. Housley<sup>1</sup>, Lilya V. Matyunina<sup>1</sup>, L. DeEtte McDonald<sup>1</sup>, Victoria L.

3 Bae-Jump<sup>2</sup>, Benedict B. Benigno<sup>3</sup>, Jeffrey Skolnick<sup>1,4</sup>, and John F. McDonald<sup>1\*</sup>

4

5 <sup>1</sup>Integrated Cancer Research Center, School of Biological Sciences, Georgia Institute of  
6 Technology, 315 Ferst Drive, Atlanta, GA 30332 USA

7 <sup>2</sup>Department of Obstetrics and Gynecology, University of North Carolina, 3009 Old Clinic  
8 Building, Chapel Hill, NC 27599, USA

9 <sup>3</sup>Ovarian Cancer Institute, 1266 W. Paces Ferry Rd NW #339, Atlanta, GA 30327, USA

10 <sup>4</sup>Center for the Study of Systems Biology, School of Biological Sciences, Georgia Institute of  
11 Technology, 315 Ferst Drive, Atlanta, GA 30332, USA

12

13

14 \*Corresponding author: 315 Ferst Drive, Atlanta, GA 30332, USA; 404-550-7214;

15 [john.mcdonald@biology.gatech.edu](mailto:john.mcdonald@biology.gatech.edu)

16

17

18

## 19 HIGHLIGHTS

20

- 21 • Predictive models derived from machine learning (ML) analyses of serum metabolic  
22 profiles can accurately (PPV 93%) detect ovarian cancer (OC).
- 23 • Only a minority of the most predictively informative metabolites are currently annotated  
24 (7%).
- 25 • Lipids predominate among the most predictively informative metabolites currently  
26 annotated.
- 27 • The frequency distribution of model-derived patient scores can be used to develop a  
28 useful clinical tool for the diagnosis of OC.

29

30 **Abstract**

31

32 *Objective.* The identification/development of a machine learning (ML)-based classifier  
33 that utilizes metabolic profiles of serum samples to accurately identify individuals with ovarian  
34 cancer (OC).

35 *Methods.* Serum samples collected from 431 OC patients and 133 normal women at four  
36 geographic locations were analyzed by mass spectrometry. Reliable metabolites were identified  
37 using recursive feature elimination (RFE) coupled with repeated cross-validation (CV) and used  
38 to develop a consensus classifier able to distinguish cancer from non-cancer. The probabilities  
39 assigned to individuals by the model were used to create a clinical tool that assigns a likelihood  
40 that an individual patient sample is cancer or normal.

41 *Results.* Our consensus classification model is able to distinguish cancer from control  
42 samples with 93% accuracy. The frequency distribution of individual patient scores was used to  
43 develop a clinical tool that assigns a likelihood that an individual patient does or does not have  
44 cancer.

45 *Conclusions.* An integrative approach using metabolomic profiles and ML-based  
46 classifiers has been employed to develop a clinical tool that assigns a probability that an  
47 individual patient does or does not have OC. This personalized/probabilistic approach to cancer  
48 diagnostics is more clinically informative and accurate than traditional binary (yes/no) tests and  
49 represents a promising new direction in the early detection of OC.

50

51 **1. Introduction**

52 Early cancer diagnosis is one of the most important contributing factors to the successful  
53 treatment of the disease [1]. Early diagnosis is especially challenging for cancers like ovarian  
54 cancer (OC) that can progress rapidly, and yet display little to no clinical symptoms early in their  
55 development [2]. The ideal cancer diagnostic should not only be highly accurate, but additionally  
56 non-invasive and low cost to be widely available to the general public. Despite heroic efforts to  
57 develop such cancer diagnostics over the last several decades, this goal has proven to be  
58 frustratingly elusive [3]. A major reason for this is that, on the molecular level, cancer is a highly  
59 heterogenous disease not only between different types of cancer but even among individuals with  
60 the same cancer type [4]. As a consequence, finding a single molecular biomarker or set of  
61 biomarkers that are universally shared among individuals with even the same type of cancer is  
62 extremely difficult.

63 In recent years, various computational methods, including machine learning (ML), have  
64 been applied in efforts to identify patterns embedded within large omics datasets (*e.g.*,  
65 genomic/proteomic/metabolomic) that may constitute an accurate diagnostic of cancer [5], [6]  
66 and other diseases [7]. For example, perturbations of metabolic levels in the blood and/or other  
67 body fluids have long been considered promising indicators of cancer and other diseases [8], [9]  
68 because metabolites constitute end points of many, if not most, of the molecular processes  
69 underlying biological functions. As such, metabolic profiles have been proposed as a molecular  
70 phenotype of biological systems, reflective of collective information encoded at the genome  
71 level and realized at the transcriptome and proteome levels [10].

72 Despite the inherent advantages of metabolic patterns as biomarkers of cancer and other  
73 diseases, extreme care is required in both the selection and analysis of metabolomic datasets. For  
74 example, potential technical inconsistencies in data acquisition (*e.g.*, variation in sensitivity

75 between instruments/laboratories and/or analytic drift associated with the same instrument over  
76 time) can easily compromise the reliability of acquired datasets unless frequent standardization  
77 with control samples is employed throughout the analytic process. In addition, extra precaution  
78 is needed in both the computational analysis of metabolic and other omics datasets and the  
79 interpretation of results. For example, there are a variety of ML approaches to the analysis of  
80 omics data, and each is associated with individual strengths and weaknesses [11], [12]. Despite  
81 these challenges, the use of metabolomic and other omics profiles as early indicators of cancer is  
82 not insurmountable and may provide clinicians with a powerful and highly accurate tool for  
83 personalized cancer diagnosis when properly addressed.

84 We report here on the development of a ML-based approach for the early detection of OC  
85 using metabolomic profiles in blood. Analyses were carried out on serum samples collected from  
86 431 OC patients and 133 normal women at four geographic locations in the United States and  
87 Canada. The utility of a consensus classifier was evaluated using four independent sets of  
88 metabolomic profiles. Combining the best predictions from each profile using the consensus  
89 classifier resulted in a final set of predictions that can distinguish cancer from control samples  
90 with high accuracy (PPV 93%). We illustrate how the frequency distribution of individual patient  
91 scores can be used to develop a useful clinical tool that may be used to assign a likelihood that an  
92 individual does or does not have OC.

93

## 94 **2. Methods**

95 Details of the extensive methods employed in this study are presented in the  
96 Supplementary Material. Briefly, 431 serous papillary OC and 133 normal serum samples were  
97 obtained from four geographic locations (Atlanta, GA, Philadelphia, PA, Chapel Hill, NC, and

98 Alberta, Canada) and were transferred to *Creative Proteomics* laboratory (Shirley, NY) for ultra-  
99 performance liquid chromatography, high-resolution mass spectrometry (UPLC-MS) analysis. A  
100 pooled quality control sample was obtained by combing equal amounts of each of the individual  
101 OC and control serum samples. Samples were individually processed through two different  
102 columns and analyzed using two different ionization modes (negative and positive) resulting in  
103 four distinct datasets (HP: HILIC positive; HN: HILIC negative; RN: C<sub>18</sub> reversed phase  
104 negative; RP: C<sub>18</sub> reversed phase positive). Reliable features (metabolites) were identified using  
105 recursive feature elimination (RFE) coupled with repeated cross-validation (CV). The output  
106 from these processing steps for each of the four datasets was an assignment of a relative ranking  
107 of features reflective of the relative frequencies of the features after repeated CV iterations. A  
108 consensus classifier was constructed by aggregating the results of five independent ML  
109 classifiers [logistic regression (LRC), random forest (RFC), support vector machine (SVM), k-  
110 nearest neighbor (KNN), and adaptive boosting (ADA)] to generate predictive classification  
111 models. The probabilities assigned to individuals by the consensus model were utilized to create  
112 a background distribution of probabilities that a given sample was cancer or normal.

113

### 114 **3. Results**

115

#### 116 *3.1 Data acquisition*

117

118 The data acquisition process for this study is summarized in Figure 1A. Serum samples  
119 collected from 431 OC patients and 133 non-cancerous/normal individuals were obtained from  
120 four geographic locations in the United States (Fox Chase Cancer Center-Philadelphia, PA;

121 UNC-Chapel Hill, NC; Northside Hospital-Atlanta, GA, and Canada-Alberta Health Services-  
122 Alberta, BC). Samples were characterized using ultra-performance liquid chromatography  
123 coupled with tandem mass spectrometry (UPLC-MS/MS). Each serum sample was  
124 independently processed through two different columns (HILIC and C<sub>18</sub> reversed phase) and  
125 analyzed using two different ionization modes (negative and positive) resulting in four distinct  
126 datasets during MS/MS (HP: HILIC positive; HN: HILIC negative; RN: C<sub>18</sub> reversed phase  
127 negative; RP: C<sub>18</sub> reversed phase positive). Because of the large number of samples,  
128 metabolomic analyses were conducted over two separate batches. To detect and correct  
129 instrument drift within and between runs, a pooled quality control (QC) sample was run  
130 following analysis of every ten patient samples. A scatter plot of principle component analyses  
131 performed on the preprocessed data confirmed that no significant experimental variation was  
132 detected between batches after quality control of the data (Fig. 1B).

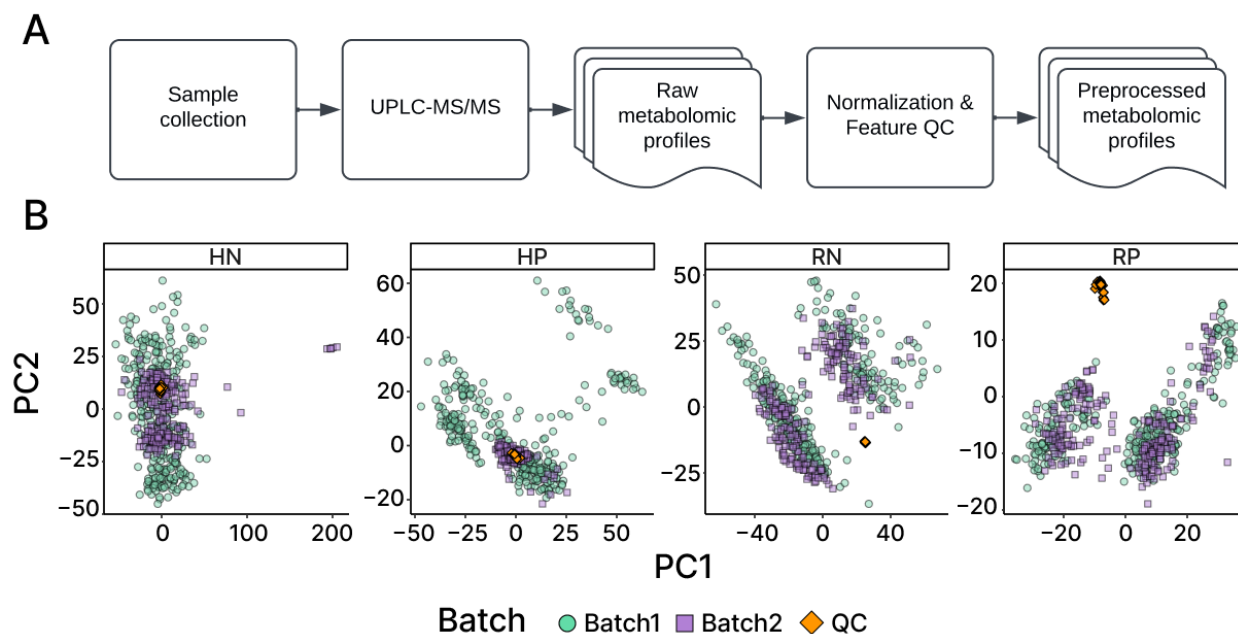

133  
134 **Fig. 1.** Workflow diagram illustrating data acquisition and preparation process. A) Serum samples from ovarian  
135 cancer patients and non-cancerous individuals are collected from multiple geolocations. They are analyzed using  
136 UPLC-MS/MS in an untargeted workflow to characterize the metabolome of ovarian cancer patients. Normalization  
137 and filtering of the features are performed following the best practices to obtain the preprocessed metabolomic  
138 profiles for downstream analyses. B) Scatter plot of principal component analysis performed on the preprocessed

139 data after accounting for systematic and random errors. QC samples (orange) are shown to mostly cluster together  
140 with no clear separation between the two batches, indicating unwanted experimental variation has been eliminated.

141

### 142 *3.2 Assessing the Stability of Metabolomic Features*

143

144 The overall goal of our study is the identification/development of a ML classifier that  
145 utilizes metabolic profiles to accurately distinguish individuals with or without OC. Toward this  
146 end, we independently examined the predictive accuracy of five ML classifiers for each of the  
147 four datasets: RFC, SVC, ADA, KNN, and LRC.

148 Prior to the independent evaluation of each of these classifiers, we identified reliable  
149 features (metabolites) with recursive feature elimination (RFE) [13] coupled with repeated cross-  
150 validation (CV). The output from these processing steps for each of the four datasets was an  
151 assignment of a relative ranking of features reflective of the relative frequencies of the features  
152 after repeated CV iterations, as well as their relative contribution levels as determined by the  
153 Gini importance scores (see Methods in Supplementary Material for details).

154 Across all four datasets, we observed a moderate positive correlation (HN:  $R = 0.26$ ,  $p <$   
155  $0.001$ ; HP:  $R = 0.56$ ,  $p < 0.001$ ; RN:  $R = 0.39$ ,  $p < 0.001$ ; RP:  $R = 0.50$ ,  $p < 0.001$ ) between the  
156 relative frequency of features and their importance (Fig. 2). This trend is most apparent in the RP  
157 dataset where the vast majority of features of high importance were in high frequency. In  
158 contrast, the HP dataset displayed a number of lower frequency features of high Gini importance  
159 (See Methods in Supplementary Material for details).

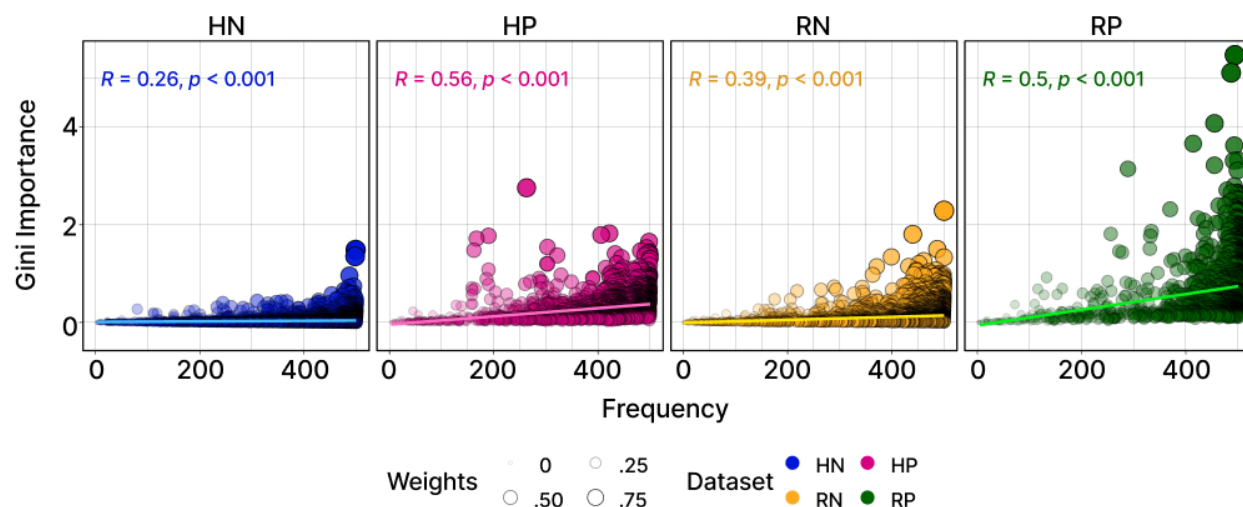

160

161 **Fig. 2.** The frequency and Gini importance values of features in each dataset. The x-axis and y-axis correspond  
162 to feature frequency and importance value, respectively. The weights computed by combining frequencies  
163 and importance values were represented by the sizes and opacity of the points. The analysis revealed that  
164 across all datasets, many features had high frequency but relatively lower levels of importance. The HN  
165 dataset exhibited the smallest range of importance values, while most features were observed frequently.  
166 The RN and HP datasets showed a similar pattern, with the HP dataset being particularly noteworthy due  
167 to a subset of features displaying lower frequencies but higher importance values. The RP dataset  
168 displayed the largest number of features with high levels of both frequency and importance values.

169

170 Features were assigned weights, a combined metric of both relative frequency and  
171 importance, then ranked and grouped into rank groups. Features were then classified with respect  
172 to putative functions using the human metabolome database (HMDB, <https://hmdb.ca>). Lipids  
173 and lipid-like molecules were found to be widely distributed across rank groups while most other  
174 putatively annotated classes of metabolites were predominantly associated with lower rank  
175 features (Supplementary Fig. 5). The vast majority of the highly ranked features remain  
176 unannotated. Indeed, only ~7% of the complete set of features identified in this study were  
177 associated with metabolite information from HMDB.

178

179 *3.3 Evaluation of Classifier Performance*

180



181 Prior to the evaluation of the classifier performance, a neural network based autoencoder  
182 was used to reduce the dimensionality of the datasets while preserving informative representation  
183 of the original (Supplementary Fig. 6). Using the compressed dataset, the ability of each of the  
184 five classifiers (RFC, SVC, ADA, KNN, LRC) to correctly identify cancer samples and non-  
185 cancer controls was independently evaluated using four metrics: 1) Positive predictive value  
186 (PPV, a.k.a. precision), 2) negative predictive value (NPV), 3) f1-score (F1), and 4) Matthew's  
187 correlation coefficient (MCC). PPV (precision) is the number of true positives divided by the  
188 number of true positives plus false positives (potential range: 0-100%), while NPV is the number  
189 of true negatives divided by the number of true negatives plus false negatives (potential range: 0-  
190 100%). The f1-score, which symmetrically represents both precision and recall in a single metric,  
191 is the harmonic mean of precision and recall (a.k.a. sensitivity; potential range: 0-100%). MCC  
192 reflects the correlation between the observed and predicted binary classifications (potential  
193 range: -1 to +1). An MCC of +1 represents a perfect prediction, 0 no better than a random  
194 prediction and -1 indicates total disagreement between predictions and observations. MCC  
195 considers true and false positives and negatives and is generally regarded as a balanced measure  
196 of predictive accuracy even if the classes are of very different sizes [14]. The performance of  
197 each of the five classifiers and the consensus classifier based on repeated cross-validation is  
198 presented in Table 1.

199  
200 **Table 1**

201 Performance evaluation metrics for individual and consensus classifier

| Dataset | Classifier | PPV | NPV | F1  | MCC  | Dataset | Classifier | PPV | NPV | F1  | MCC  |
|---------|------------|-----|-----|-----|------|---------|------------|-----|-----|-----|------|
| HN      | SVC        | 97% | 88% | 95% | 0.86 | RN      | Consensus  | 97% | 90% | 95% | 0.86 |
|         | Consensus  | 96% | 89% | 95% | 0.85 |         | SVC        | 97% | 88% | 95% | 0.86 |
|         | KNN        | 96% | 88% | 94% | 0.83 |         | LRC        | 97% | 88% | 95% | 0.85 |
|         | LRC        | 95% | 89% | 94% | 0.83 |         | ADA        | 96% | 91% | 95% | 0.85 |

|    |           |     |     |     |      |    |           |     |     |     |      |
|----|-----------|-----|-----|-----|------|----|-----------|-----|-----|-----|------|
|    | ADA       | 95% | 90% | 94% | 0.83 |    | KNN       | 95% | 90% | 94% | 0.84 |
|    | RFC       | 95% | 88% | 93% | 0.82 |    | RFC       | 95% | 92% | 94% | 0.84 |
| HP | Consensus | 95% | 89% | 94% | 0.82 | RP | Consensus | 96% | 92% | 95% | 0.87 |
|    | SVC       | 95% | 88% | 93% | 0.82 |    | SVC       | 96% | 91% | 95% | 0.85 |
|    | KNN       | 94% | 88% | 93% | 0.79 |    | KNN       | 95% | 90% | 94% | 0.84 |
|    | LRC       | 94% | 87% | 92% | 0.78 |    | LRC       | 95% | 90% | 94% | 0.83 |
|    | ADA       | 93% | 91% | 93% | 0.8  |    | ADA       | 95% | 93% | 94% | 0.84 |
|    | RFC       | 93% | 88% | 92% | 0.78 |    | RFC       | 94% | 92% | 93% | 0.81 |

202  
203  
204

While the performance of the individual and consensus classifiers varied across different datasets, the differences were minor. The HP dataset displayed a slightly lower performance relative to the HN, RN, and RP datasets. However, the overall performance was consistently high across the four datasets (PPV  $\geq$  93%; NPV  $\geq$  87%; F1  $\geq$  92%; MCC  $\geq$  0.78; Fig. 3A). The cumulative confusion matrix from the consensus classifier (Fig. 3B) is generally consistent with these results demonstrating a relatively low misclassification rate of false negatives (~2 to 3%) and slightly higher rate of false positives (~11 to 17%).

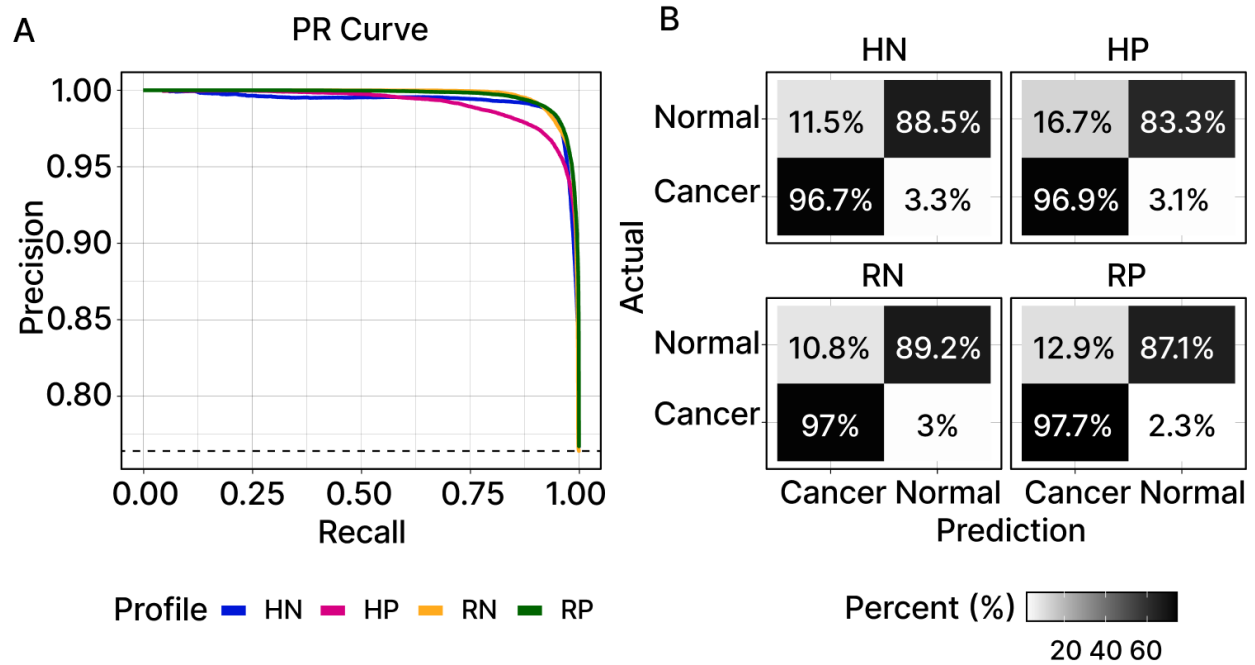

211

212 **Fig. 3.** Comparison of consensus classifier performance. A) The performance characteristics of the models were

213 graphically represented through precision-recall (PR) curves. Besides the HP dataset, the models for the remaining

214 datasets showed similar levels of performance. B) Cumulative confusion matrices, also compiled from repeated CV,  
215 further reinforced these observations despite the false positives (FP) and false negatives (FN).

216

### 217 *3.4 Utility of class probabilities as background distributions*

218

219 The results of the repeated cross-validation scores can be used to assign a mean  
220 probability (adjusted to fall within a -2 to 2 range) that signifies the certainty of either a  
221 cancerous or non-cancerous classification. These probabilities were averaged for each sample  
222 and the distributions for each of the four datasets are displayed in Fig. 4A. The results highlight  
223 the classifier's ability to clearly distinguish between cancerous and non-cancerous samples in all  
224 four datasets.

225 By combining results from the four datasets and selecting the best average score among  
226 them, we observed a notable improvement in classifying both cancer and normal samples. This  
227 underscores that each dataset brings its unique contribution to the accurate prediction of cancer  
228 or non-cancer status (Fig 4B). A striking 97% of the cancer samples scored within the 1.0-2.0  
229 range, with no (0%) misclassification of non-cancerous samples (Supplementary Table 7). In  
230 contrast, 83% of the non-cancerous/normal samples were found to fall within the -2.0 to -1.0  
231 score range indicating that our consensus classifier is better at predicting cancer than non-cancer.

232 When binary classification results for the cancer samples are subdivided into early-stage  
233 (Stage I/II) and late-stage (Stage III/IV) cancer groups, the classifier still demonstrates high  
234 accuracy. It not only identifies late-stage cancer samples effectively but also classifies early-  
235 stage samples accurately. This holds true when considering both individual scores (Figure 4C)  
236 and best scores (Figure 4D). Using the best scores, the classifier's predictive accuracy reaches  
237 98% for early-stage samples and 92.7% for late-stage cancers for score range 1.5-2

238 (Supplementary Table 7). Adoption of our proposed workflow in a clinical setting would enable  
239 women to undergo serum profiling at a clinic to predict their cancer status (Fig. 4E).

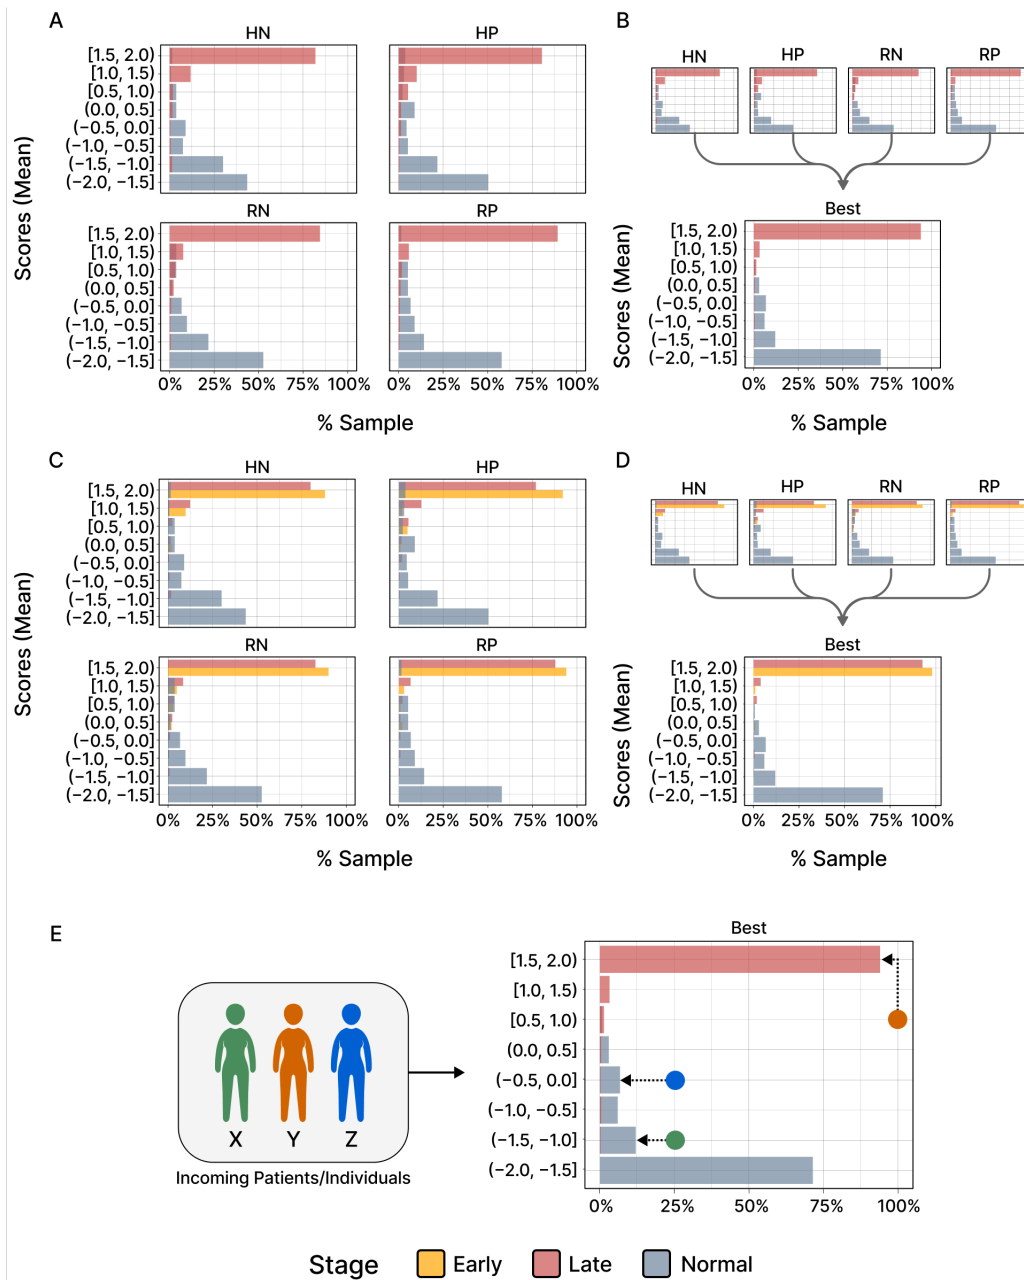

240

241

242 **Fig. 4.** Evidence for the classifier's ability to clearly distinguish between cancerous and non-cancerous samples. A)  
243 The bar charts exhibit the distributions of scores that have been converted from class probabilities and ranged from -  
244 2 to 2 to improve visual clarity. The scores represent averages obtained from repeated cross-validation (CV) for each  
245 sample. Clear differentiation can be observed between the scores of cancer (red) and normal (blue) samples across  
246 all four datasets. The peaks in the distributions indicate the most frequently occurring score range for the samples.  
247 B) Similar to the previous bar chart, this figure illustrates the best average score across the four datasets

248 demonstrating a notable improvement in classifying both cancer and normal classes. C) The bar chart illustrates the  
249 distribution of samples across various score ranges. This revealed that early- and late-stage samples clearly  
250 distinguish themselves from the normal samples. D) In an analogous manner to figure B), selecting the best score  
251 improves the final score for the scores at the stage-level. E) Diagram visualizing the potential adoption of the  
252 proposed workflow in a clinical setting. Given the absence of approved screening methods for ovarian cancer, this  
253 approach enables women to undergo serum profiling at a clinic to predict their cancer status. This could result in  
254 three possible scenarios: an individual's serum profile (X) falls within a score range where misdiagnosis is unlikely,  
255 enabling a confident ruling out of a cancer diagnosis. An individual's score (Y) falls within a range where 94% of  
256 others with this score have been diagnosed with cancer. Lastly, determining the cancer status of an individual (Z)  
257 may be challenging, as there are only a few samples within this score range and it is in the middle of the distribution.

#### 258 **4. Discussion**

259           Although the incidence of OC is relatively low (2.5% of all malignancies in women [15]),  
260 it is among the most lethal of all cancers due to its high mortality rate. The reason for this is  
261 largely attributable to the fact that the disease is not typically diagnosed until the late (post-  
262 metastatic) stages of development (Stage III/IV) when effective treatment is difficult. For  
263 example, the most common sub-type of OC, serous papillary (65% of OC patients), is typically  
264 not diagnosed until Stage III/IV when the 5-year survival rate is only 31%. In contrast, if the  
265 disease is identified and treated early in its development (Stage I/II), the 5-year survival rate is  
266 93%. These statistics dramatically underscore the dire need for an early diagnostic test for OC  
267 and other cancers where early-stage clinical symptoms are virtually non-existent.

268           The traditional approach for the identification of non-invasive biomarkers of cancer has  
269 been the screening of blood (or other body fluids) in search of significant changes in the  
270 presence/levels of molecules (typically proteins) associated with the disease [16]. A well-known  
271 example of such a diagnostic is the PSA (prostate specific antigen) biomarker for prostate cancer  
272 [17].

273           The OC biomarker candidate, CA125 (a.k.a., mucin 16/ MUC16) [18] was first  
274 introduced in 1996 [19]. Although an elevated level of CA125 is detected in ~90% of late stage  
275 (III/IV) OC patients, it is elevated in only ~50% of early-stage patients making it a poor  
276 biomarker of early-stage disease with a PPV of only ~30% [20]. In 2003, a second candidate

277 biomarker for OC, HE4 (human epididymis protein), was introduced [21]. While HE4 was an  
278 improvement over CA125 in having a reported PPV of ~58%, it is still not sufficiently accurate  
279 to serve as a diagnostic test. Combining the results of the HE4 and CA125 together did not  
280 significantly improve PPV. However, the combination did lead to the development of a logistic  
281 regression model called ROMA (risk of malignancy algorithm) that was approved by FDA in  
282 2011 as a method to classify patients with a pelvic mass into those with high vs. low risk of  
283 having OC [20].

284 By the early 2000s, it was becoming progressively clear that, on the molecular level at  
285 least, cancer was a much more complex disease than originally envisioned [4]. This realization  
286 was supported by findings indicating the existence of a multitude of disrupted molecular  
287 pathways (and underlying mutations) capable of leading to even the same cancer type. Such  
288 molecular level heterogeneity among individual cancer patients made the likelihood of  
289 identifying one or two biomarkers capable of accurately diagnosing all individuals with even the  
290 same type of cancer highly unlikely. As a consequence, the search for more accurate ways to  
291 diagnose cancer became focused on exploring larger combinations of biomarkers that might  
292 better capture the molecular heterogeneity underlying the disease [22]–[25].

293 In the case of OC, there were a number of multi-biomarker diagnostic tests developed in  
294 the early 2000s [26]–[28]. However, none of these early efforts were sufficiently validated to  
295 acquire FDA approval. In 2009, an assay (trade name OVA1) was proposed that incorporated  
296 levels of five serum proteins combined with proprietary software to generate high or low  
297 probability that an ovarian mass was a malignant tumor [29]. While the test was approved by  
298 FDA as a clinical aid in determining if a patient should be referred for further analysis, the test's  
299 low PPV (31%) [30] eliminated it from consideration as an effective OC diagnostic. A more

300 recent version of the OVA1 test (initially known as OVA2 but now trademarked as OVERA)  
301 uses a slightly different set of proteins upon which to generate its predictions. Although an  
302 improvement over OVA1, OVERA continues to be associated with a relatively low PPV (~40%)  
303 [31], thereby again excluding it as a reliable OC diagnostic.

304 With the expanded availability of omics technologies and associated datasets (*e.g.*,  
305 genomic, transcriptomic, proteomic, metabolomic) in recent years, a new approach to diagnostics  
306 began to emerge [32]. The application of various AI (artificial intelligence) approaches, most  
307 notably machine learning, to the analysis of large omics datasets of diseased and non-diseased  
308 individuals opened the possibility of the identification of patterns by which these categories  
309 could be distinguished. Predictive models built upon such classifications might then constitute a  
310 new generation of diagnostic tests.

311 While this basic concept is straightforward, its application is certainly not. There are  
312 multiple approaches to ML, and each is associated with individual strengths and weaknesses  
313 [11], [12]. In addition, the output from ML analyses of omics datasets is heavily dependent upon  
314 both the quality and type of data being analyzed. For example, classifiers that are based  
315 exclusively on ML analysis of DNA sequence datasets may be appropriate if the onset and  
316 progression of the disease in question is exclusively attributable to genetic mutations. Certainly,  
317 there is a significant genetic component to cancer, but other environmental (*e.g.*, diet, lifestyle,  
318 microbiome, *etc.*) and molecular (*e.g.*, epigenetic/gene expression changes, gene-gene/protein-  
319 protein interactions, *etc.*) factors are also known to play significant roles. Indeed, it has been  
320 proposed that the accurate characterization of a complex disease like cancer will ultimately  
321 require simultaneous analyses of multi-omics datasets [33]. While this may well be the case, the

322 development of computational methodologies sufficiently complex to accurately characterize  
323 multi-omics datasets is only in its infancy [34], [35].

324 In lieu of an approach that simultaneously analyzes multi-omics datasets, we chose a  
325 currently available alternative, *i.e.*, working with a dataset that reflects biological changes  
326 occurring on multiple levels. Metabolic profiles are widely viewed as a molecular phenotype  
327 reflective of underlying collective information encoded at the genome level and realized at the  
328 transcriptome and proteome levels. As such, metabolic profiles have long been considered  
329 promising indicators of cancer and other complex diseases [8], [9].

330 To help ensure the quality of our metabolic data, individual normal and OC patient  
331 samples were collected from four geographically divergent locations and analyzed using ultra-  
332 performance liquid chromatography coupled with tandem mass spectrometry (UPLC-MS/MS-  
333 positive and negative modes and each sample independently pre-processed through two  
334 columns) generating four distinct datasets (HN: HILIC negative; HP: HILIC positive; RN: C<sub>18</sub>  
335 reversed phase negative; RP: C<sub>18</sub> reversed phase positive). To guard against instrumental drift  
336 between runs, the same control samples were analyzed following every ten biological samples.  
337 Principle component analyses of data generated from our MS analyses across different batches  
338 and times demonstrated little experimental variation between runs.

339 Each of our four datasets was analyzed separately to determine if any particular dataset  
340 contained more relevant information than any other. We found little difference in the accuracy of  
341 predictions computed using each dataset individually. When we combined the best average score  
342 from each of the four datasets, we observed an improvement in the classification of both cancer  
343 and normal samples. This suggests that each of the four datasets contribute uniquely to the  
344 accurate prediction of cancer status.



345           Computationally, we evaluated the performance of five independent ML classifiers. A  
346 consensus classifier that generates average predictive probabilities from the probabilities of each  
347 of the individual classifiers gave the best overall performance with a PPV of 93%. Interestingly,  
348 the overall predictive accuracy of our consensus classifier was better for early- relative to late-  
349 stage patients. We found that late-stage patients display greater heterogeneity in molecular  
350 profiles than early-stage patients. While the reason for this dichotomy is currently unknown, the  
351 preliminary findings suggest that OCs may become more metabolically heterogeneous as they  
352 progress/metastasize. However, because the sample size of early-stage patients is considerably  
353 less than late-stage patients in this study, further analysis of expanded datasets will be required to  
354 resolve this issue.

355           Our model's accuracy in predicting women with OC is slightly greater than its accuracy  
356 in predicting women without the disease. The reason for this is currently unknown but may, at  
357 least in part, be due to the fact that the model may be detecting disease in women prior to clinical  
358 symptoms and clinical diagnosis. Time course studies are currently being instituted to test this  
359 hypothesis.

360           The high PPV (93%) associated with our consensus classifier supports the notion that ML  
361 analysis of omics data, and of metabolomic data in particular, is an extremely promising  
362 approach for the future diagnosis of ovarian and possibly other cancers as well. Such analyses  
363 will likely lead to a more probabilistic approach to cancer diagnosis that will serve to personalize  
364 the process much as genomic profiling of individual patient tumors is personalizing cancer  
365 treatment (*i.e.*, precision cancer medicine).

366           Despite these highly favorable prospects, it is important to keep in mind the limitations of  
367 ML analyses of omics data. For example, the PPV associated with even the same ML based

368 predictive model can be highly sensitive to the size and composition of the datasets employed in  
369 building and testing the models. For example, in an earlier pilot study of the metabolic profiles of  
370 a relatively small number (46) of OC patient samples collected from one of the same areas  
371 sampled in our current study (Northside Hospital, Atlanta), the authors generated a predictive  
372 model with a putative accuracy of 100% [36]. The relative reduction in accuracy associated with  
373 our current model relative to this earlier study coupled with the fact that none of the top ranked  
374 features in the earlier study ranked within the top 100 features in our current study  
375 (Supplementary Table 8) underscores the impact of datasets on ML/metabolomic based  
376 predictive models. Future refinements in the development of metabolomic (and likely all omics)  
377 based ML models will need to address the issue of how many samples over what geographic area  
378 are needed to reflect the full spectrum of diversity in OC (and other cancer types).

379 In an effort to exemplify how the type of results generated in our study might, in the  
380 future, translate into a clinically useful tool, we grouped the quantity and percentage of our  
381 samples into score ranges. We envision a clinical tool in which the scores of individual patients  
382 can be mapped across such a distribution providing a likelihood that an individual patient does or  
383 does not have cancer. Such information could serve as a significant aid in determining the need  
384 for treatment or continued monitoring. For example, consider the scenarios presented in Fig. 4F.  
385 Scenario (A) represents a situation in which an individual's serum profile falls within a score  
386 range that makes cancer highly unlikely. In such a case, the individual may only require yearly  
387 monitoring. In scenario (B), the detection is more problematic due to a relatively small number  
388 of samples in this score range and a comparable number of cancerous and non-cancerous  
389 patients. In such cases, a patient may be referred for more additional and/or more frequent  
390 screening. Scenario (C) depicts a situation where an individual's score lies in a range where a

391 majority (94%) of patients has been diagnosed with cancer. In such a case, the patient would  
392 likely be referred for immediate advanced screening/treatment.

393 In summary, our results confirm the overall potential of an integrative approach using  
394 metabolomic profiles and ML-based classifiers for the detection of OC. The accuracy of these  
395 classifiers is highly dependent upon both the quality and quantity of the data upon which models  
396 are built. We found little difference in the accuracy of predictions generated using alternative  
397 ML classifiers, although the consensus classifier generated the most accurate predictions.  
398 Application of results generated from our consensus classifier illustrated how the frequency  
399 distribution of individual patient scores can be used to develop a useful clinical tool that assigns  
400 a likelihood that an individual does or does not have OC. We believe this  
401 personalized/probabilistic approach to cancer diagnostics is more robust and clinically  
402 informative than the more traditional binary (yes/no) tests and may represent a promising new  
403 direction in the early detection of OC and perhaps other cancer types as well.

404

#### 405 **Fundings**

406 This research was funded by the Ovarian Cancer Institute (Atlanta), the Laura Crandall Brown  
407 Foundation, the Deborah Nash Endowment Fund, Northside Hospital (Atlanta), and the Mark  
408 Light Integrated Cancer Research Student Fellowship.

409

#### 410 **CRedit authorship contribution statement**

411 **Dongjo Ban:** Conceptualization, Formal analysis, Investigation,

412 Methodology, Software, Roles/Writing -original draft. **Stephen N. Housley:** Formal

413 analysis, Software, Writing - review & editing. **Lilya V. Matyunina:** Data curation. **L. DeEtte**  
414 **McDonald:** Data curation, Writing - review & editing. **Victoria L. Bae-Jump:** Data curation.  
415 **Benedict B. Benigno:** Data curation, Funding acquisition. **Jeffrey Skolnick:** Formal  
416 analysis, Writing - review & editing. **John F.**  
417 **McDonald:** Conceptualization, Investigation, Project administration,  
418 Resources, Supervision, Roles/Writing -original draft, Writing - review & editing.

419

## 420 **Declaration of Competing Interest**

421 The authors have no conflict of interest to declare.

422

## 423 **Acknowledgements**

424 We thank Ramit Bharanikumar and Zainab Arshad for their contributions to pilot studies  
425 related to this project.

426

## 427 **Supplementary Material**

428 Supplementary material to this article can be found online at <https://>

## 429 **References**

- 430 [1] D. Crosby, S. Bhatia, K.M. Brindle, L.M. Coussens, C. Dive, M. Emberton, et al., Early  
431 detection of cancer, *Science*. 375 (2022) eaay9040. doi: 10.1126/science.aay9040.  
432 [2] C. Stewart, C. Ralyea, S. Lockwood, Ovarian cancer: An integrated review, *Semin. Oncol.*  
433 *Nurs.* 35 (2019) 151-156. doi: 10.1016/j.soncn.2019.02.001.  
434 [3] J.D. Brooks, Translational genomics: The challenge of developing cancer biomarkers,  
435 *Genome Res.* 22 (2012) 183–187. doi: 10.1101/gr.124347.111.  
436 [4] R.A. Burrell, N. McGranahan, J. Bartek, C. Swanton, The causes and consequences of  
437 genetic heterogeneity in cancer evolution, *Nature*. 501 (2013) 338-345. doi:  
438 10.1038/nature12625.  
439 [5] J.T. Shreve, S.A. Khanani, T. C. Haddad, Artificial intelligence in oncology: Current  
440 capabilities, future opportunities, and ethical considerations, *Amer. Soc. Clin. Oncol. Edu.*  
441 *Book.* 42 (2022) 842–851. doi: 10.1200/EDBK\_350652.

- 442 [6] J.F. McDonald, Back to the future - The integration of big data with machine learning is re-  
443 establishing the importance of predictive correlations in ovarian cancer diagnostics and  
444 therapeutics, *Gyn. Oncol.* 149 (2018) 230–231. doi: 10.1016/j.ygyno.2018.03.053.
- 445 [7] Y. Kumar, A. Koul, R. Singla, M. F. Ijaz, Artificial intelligence in disease diagnosis: a  
446 systematic literature review, synthesizing framework and future research agenda, *J. Ambient*  
447 *Intell. Humaniz Comput.* 14 (2023) 8459-8486. doi: 10.1007/s12652-021-03612-z.
- 448 [8] C. Beuchel, J. Dittrich, J. Pott, S. Henger, F. Beutner, B. Isermann, et al., Whole blood  
449 metabolite profiles reflect changes in energy metabolism in heart failure, *Metabolites.* 12  
450 (2022) 216. doi: 10.3390/metabo12030216.
- 451 [9] V.H. Telle-Hansen, J.J. Christensen, G.A. Formo, K.B. Holven, S.M. Ulven, A  
452 comprehensive metabolic profiling of the metabolically healthy obesity phenotype, *Lipids*  
453 *Health Dis.* 19 (2020) 90. doi: 10.1186/s12944-020-01273-z.
- 454 [10] O.P. Trifonova, P.G. Lokhov, A.I. Archakov, Metabolic profiling of human blood,  
455 *Biochem. Moscow Suppl. Ser. B.* 7 (2013) 179–186. doi: 10.1134/S1990750813030128.
- 456 [11] P.S. Reel, S. Reel, E. Pearson, E. Trucco, E. Jefferson, Using machine learning approaches  
457 for multi-omics data analysis: A review, *Biotech. Adv.* 49 (2021) 107739. doi:  
458 10.1016/j.biotechadv.2021.107739.
- 459 [12] S. Albaradei, M. Thafar, A. Alsaedi, C. Van Neste, T. Gojobori, M. Essack, Z. Gao,  
460 Machine learning and deep learning methods that use omics data for metastasis prediction,  
461 *Comput. Struct. Biotechnol. J.* 19 (2021) 5008–5018. doi: 10.1016/j.csbj.2021.09.001.
- 462 [13] I. Guyon, J. Weston, S. Barnhill, V. Vapnik, Gene selection for cancer classification  
463 using support vector machines, *Mach. Learn.* 46 (2002) 389–422. doi:  
464 10.1023/A:1012487302797.
- 465 [14] D. Chicco, N. Tötsch, G. Jurman, The Matthews correlation coefficient (MCC) is more  
466 reliable than balanced accuracy, bookmaker informedness, and markedness in two-class  
467 confusion matrix evaluation, *BioData Mining.* 14 (2021) 13. doi: 10.1186/s13040-021-  
468 00244-z.
- 469 [15] L.A. Torre et al., Ovarian cancer statistics, 2018, *CA Cancer J. Clin.* 68 (2018) 284–296.  
470 doi: 10.3322/caac.21456.
- 471 [16] S.K. Chatterjee B.R. Zetter, Cancer biomarkers: knowing the present and predicting the  
472 future, *Future Oncol.* 1 (2005) 37–50. doi: 10.1517/14796694.1.1.37.
- 473 [17] A.R. Rao, H.G. Motiwala, O.M.A. Karim, The discovery of prostate-specific antigen,  
474 *BJU Inter.* 101 (2008) 5–10. doi: 10.1111/j.1464-410X.2007.07138.x.
- 475 [18] E.P. Diamandis, R.C. Bast, Jr., P. Gold, T.M. Chu, J.L. Magnani, Reflection on the  
476 discovery of carcinoembryonic antigen, prostate-specific antigen, and cancer antigens  
477 CA125 and CA 19-9, *Clin. Chem.* 59 (2013) 22-31.  
478 <https://doi.org/10.1373/clinchem.2012.187047>
- 479 [19] K. Nustad, R.C. Bast Jr, T.J. Brien, O. Nilsson, P.Seguin, M.R. Suresh, et al., Specificity  
480 and affinity of 26 monoclonal antibodies against the CA 125 Antigen: First report from the  
481 ISOBM TD-1 Workshop, *Tumor Biol.* 17 (2009) 196–219. doi: 10.1159/000217982.
- 482 [20] K. Holcomb, Z. Vucetic, M.C. Miller, R.C. Knapp, Human epididymis protein 4 offers  
483 superior specificity in the differentiation of benign and malignant adnexal masses in  
484 premenopausal women, *Am. J. Obstet. Gynecol.* 205 (2011) 358.e1-6. doi:  
485 10.1016/j.ajog.2011.05.017.

- 486 [21] I. Hellström, J. Raycraft, M. Hayden-Ledbetter, J.A. Ledbetter, M. Schummer, M.  
487 McIntosh, et al., The HE4 (WFDC2) protein is a biomarker for ovarian carcinoma, *Cancer*  
488 *Res.* 63 (2003) 3695–3700.
- 489 [22] S. F. Shariat, P.I. Kaarakiewicz, R. Ashfaq, S.P. Lerner, G.S. Palapattu, R. J. Cote, et al.,  
490 Multiple biomarkers improve prediction of bladder cancer recurrence and mortality in  
491 patients undergoing cystectomy, *Cancer.* 112 (2008) 315–325. doi: 10.1002/encr.23162.
- 492 [23] K.A. Landers, M.J. Burger, M.A. Tebay, D.M. Purdie, B. Scells, H. Samaratunga, et al.,  
493 Use of multiple biomarkers for a molecular diagnosis of prostate cancer, *Int. J. Cancer* 114  
494 (2005) 950–956. doi: 10.1002/ijc.20760.
- 495 [24] D. P. Malinowski, Multiple biomarkers in molecular oncology. I. Molecular diagnostics  
496 applications in cervical cancer detection, *Expert Rev. Mol. Diagn.* 7 (2007) 117–131. doi:  
497 10.1586/14737159.7.2.117.
- 498 [25] K.N. Kang, E.Y. Koh, J.Y. Jang, C.W. Kim, Multiple biomarkers are more accurate than  
499 a combination of carbohydrate antigen 125 and human epididymis protein 4 for ovarian  
500 cancer screening, *Obstet. Gynecol. Sci.* 65 (2022) 346–354. doi: 10.5468/ogs.22017.
- 501 [26] E.F. Petricoin, A.M. Ardekani, B.A. Hitt, P.J. Levine, V.A. Fusaro, S.M. Steinberg, et al.,  
502 Use of proteomic patterns in serum to identify ovarian cancer, *Lancet* 359 (2002) 572–577.  
503 doi: 10.1016/S0140-6736(02)07746-2.
- 504 [27] G. Mor, I. Visintin, Y. Lai, H. Zhao, P. Schwartz, T. Rutherford, et al., Serum protein  
505 markers for early detection of ovarian cancer, *Proc. Natl. Acad. Sci. USA.* 102 (2005) 7677–  
506 7682. doi: 10.1073/pnas.0502178102.
- 507 [28] I. Visintin, Z. Feng, G. Longton, D.C. Ward, A.B. alvero, Y. Lai, et al., Diagnostic  
508 markers for early detection of ovarian cancer, *Clin. Cancer Res.* 14 (2008) 1065–1072. doi:  
509 10.1158/1078-0432.CCR-07-1569.
- 510 [29] F.R. Ueland, C.P. Desimone, L.G. Seamon, R.A. Miller, S. Goodrich, I. Podzielinski, et  
511 al., Effectiveness of a multivariate index assay in the preoperative assessment of ovarian  
512 tumors, *Obstet. Gynecol.* 117 (2011) 1289. doi: 10.1097/AOG.0b013e31821b5118.
- 513 [30] R.E. Bristow, A. Smith, Z. Zhang, D.W. Chan, G. Crutcher, E.T. Fung, D. G. Munroe,  
514 Ovarian malignancy risk stratification of the adnexal mass using a multivariate index assay,  
515 *Gynecol. Oncol.* 128 (2013) 252–259. doi: 10.1016/j.ygyno.2012.11.022.
- 516 [31] R.R. Urban, T.C. Pappas, R.G. Bullock, D.G. Munroe, V. Bonato, K. Agnew, B.A. Goff,  
517 Combined symptom index and second-generation multivariate biomarker test for prediction  
518 of ovarian cancer in patients with an adnexal mass, *Gynecol. Oncol.* 150 (2018) 318–323.  
519 doi: 10.1016/j.ygyno.2018.06.004.
- 520 [32] V.A. Hristova D.W. Chan, Cancer biomarker discovery and translation: proteomics and  
521 beyond, *Expert Rev. Proteo.* 16 (2019) 93–103. doi: 10.1080/14789450.2019.1559062.
- 522 [33] M. Lu X. Zhan, The crucial role of multiomic approach in cancer research and clinically  
523 relevant outcomes, *EPMA J.* 9 (2018) 77–102. doi: 10.1007/s13167-018-0128-8.
- 524 [34] G. Nicora, F. Vitali, A. Dagliati, N. Geifman, R. Bellazzi, Integrated multi-omics  
525 analyses in oncology: A review of machine learning methods and tools, *Front. Oncol.* 10  
526 (2020) Accessed: Jun. 05, 2023. [Online]. Available:  
527 <https://www.frontiersin.org/articles/10.3389/fonc.2020.01030>
- 528 [35] A. Dhillon, A. Singh, V.K. Bhalla, A systematic review on biomarker identification for  
529 cancer diagnosis and prognosis in multi-omics: From computational needs to machine  
530 learning and deep learning, *Arch Computat. Methods Eng.* 30 (2023) 917–949. doi:  
531 10.1007/s11831-022-09821-9.

532 [36] D.A. Gaul, R. Mezencev, T.Q. Long, C.M. Jones, B.B. Benigno, A. Gray, et al., Highly-  
533 accurate metabolomic detection of early-stage ovarian cancer, Sci. Rep. 5 (2015) 16351.  
534 doi: 10.1038/srep16351.  
535
